# Supplementary material
Source: Springer Nature journal article supplement (https://www.springermedizin.de/resource/supplementary/13014_2013_1262_MOESM5_ESM.pdf/9634518)

**(A)**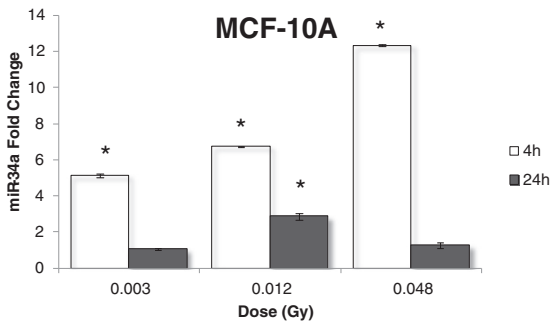**(B)**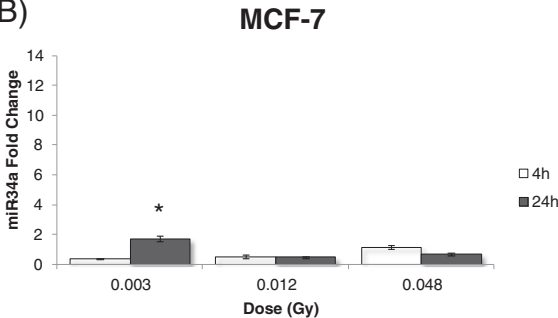

Supplement: MOESM5 [file 9634518]
